# Supplementary material for: Simulations to benchmark time-varying connectivity methods for fMRI
Source: PubMed Central journal article supplement (PMC5993323; doi:10.1371/journal.pcbi.1006196), 2018-05-29
Supplement: pcbi.1006196.s003.pdf [file pcbi.1006196.s003.pdf]

### S3 Appendix: Varying the variance of $r_t$ in simulation 2.

In simulation 2, the variance of the fluctuating covariance ( $\sigma_r$ ) in the main text was set to 0.1. Simulation 2 was run with  $\sigma_r$  set to 0.08 and 0.12 as well. S3 Appendix, Figures AB show the posterior distributions of  $\beta$  for each TVC method (same as Fig. 6 in the main text). The evaluation of model fit is displayed in S3 Appendix, Table A-F.

Overall the results are similar to those in Fig. 6 in the main text. Here we can see that changing  $\sigma_r$  effects the magnitude of  $\beta$  but does not effect how the different methods perform. The reason for the magnitude of  $\beta$  increasing as  $\sigma_r$  increases is because  $r_t$  is varying more. This decreases the uncertainty of identifying  $r_t$  since the time series covariance is drawn from distributions where  $r_t$  is a parameter. If  $r_t$  varies more, it entails that draws from distributions with different  $r_t$  values are more dissimilar.

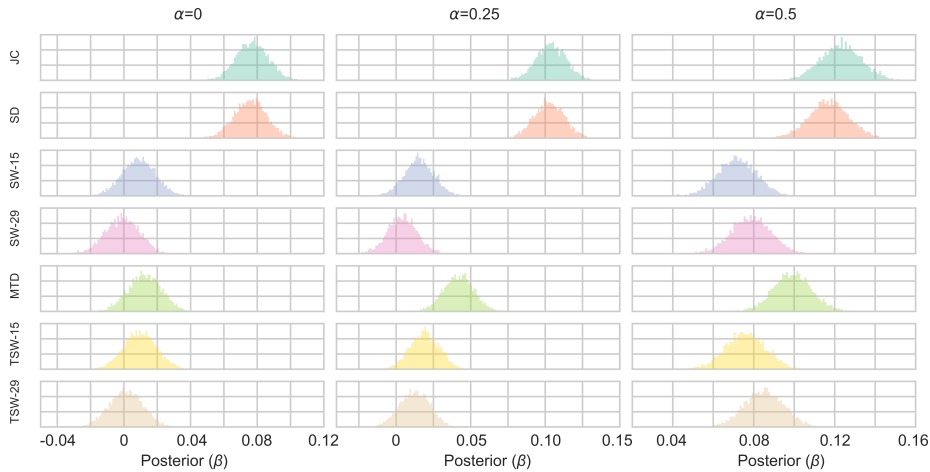

Figure A: Posterior distributions of the  $\beta$  parameter of the Bayesian linear regression models in Simulation 2. The figure shows the results for varying values of the autocorrelation parameter ( $\alpha$ ) where the variance of the fluctuating covariance ( $\sigma_r$ ) is equal to 0.08. Compliments Fig. 6 in main text.

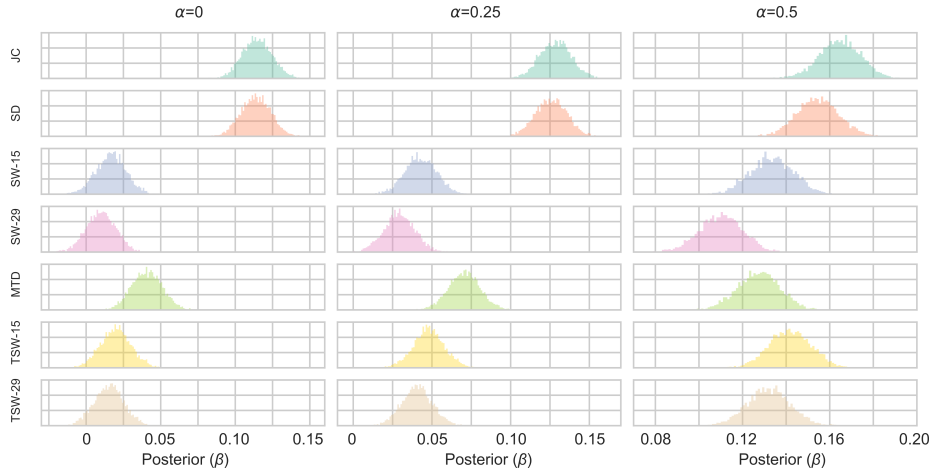

Figure B: Posterior distributions of the  $\beta$  parameter of the Bayesian linear regression models in Simulation 2. The figure shows the results for varying values of the autocorrelation parameter ( $\alpha$ ) where the variance of the fluctuating covariance ( $\sigma_r$ ) is equal to 0.12. Compliments Fig. 6 in main text.

Table A: Results of Simulation 2 where  $\alpha = 0.0$  and  $\sigma_{r_t} = 0.08$ . Tables shows WAIC, WAIC standard error, and difference in WAIC from the best performing method. A lower WAIC indicates a better fit.

| Model  | WAIC    | WAIC SE | $\Delta$ WAIC |
|--------|---------|---------|---------------|
| JC     | 28244.9 | 142.892 | 0             |
| SD     | 28247   | 142.899 | 2.01576       |
| MTD    | 28302.7 | 143.018 | 57.7415       |
| TSW-15 | 28303.4 | 142.98  | 58.4582       |
| SW-15  | 28303.5 | 142.974 | 58.5909       |
| TSW-29 | 28304.4 | 143.02  | 59.4662       |
| SW-29  | 28304.6 | 143.003 | 59.6281       |

Table B: Results of Simulation 2 where  $\alpha = 0.0$  and  $\sigma_{r_t} = 0.12$ . Tables shows WAIC, WAIC standard error, and difference in WAIC from the best performing method. A lower WAIC indicates a better fit.

| Model  | WAIC    | WAIC SE | $\Delta$ WAIC |
|--------|---------|---------|---------------|
| JC     | 28172   | 141.092 | 0             |
| SD     | 28174.2 | 141.028 | 2.25273       |
| MTD    | 28287.7 | 141.207 | 115.766       |
| TSW-15 | 28300.5 | 141.157 | 128.541       |
| SW-15  | 28301.5 | 141.104 | 129.497       |
| TSW-29 | 28302.1 | 141.132 | 130.127       |
| SW-29  | 28303.5 | 141.212 | 131.521       |

Table C: Results of Simulation 2 where  $\alpha = 0.25$  and  $\sigma_{r_t} = 0.08$ . Tables shows WAIC, WAIC standard error, and difference in WAIC from the best performing method. A lower WAIC indicates a better fit.

| Model  | WAIC    | WAIC SE | $\Delta$ WAIC |
|--------|---------|---------|---------------|
| JC     | 28195.6 | 141.754 | 0             |
| SD     | 28198.5 | 141.853 | 2.92245       |
| MTD    | 28286.7 | 141.931 | 91.1147       |
| TSW-15 | 28300.7 | 141.838 | 105.12        |
| SW-15  | 28301.9 | 141.795 | 106.334       |
| TSW-29 | 28302.8 | 141.82  | 107.248       |
| SW-29  | 28304.1 | 141.771 | 108.562       |

Table D: Results of Simulation 2 where  $\alpha = 0.25$  and  $\sigma_{r_t} = 0.12$ . Tables shows WAIC, WAIC standard error, and difference in WAIC from the best performing method. A lower WAIC indicates a better fit.

| Model  | WAIC    | WAIC SE | $\Delta$ WAIC |
|--------|---------|---------|---------------|
| JC     | 28138.9 | 141.114 | 0             |
| SD     | 28145.3 | 140.982 | 6.37803       |
| MTD    | 28254.4 | 140.782 | 115.542       |
| TSW-15 | 28281.1 | 140.996 | 142.241       |
| SW-15  | 28285.9 | 141.052 | 147.029       |
| TSW-29 | 28287.8 | 141.055 | 148.901       |
| SW-29  | 28295.7 | 141.116 | 156.845       |

Table E: Results of Simulation 2 where  $\alpha = 0.5$  and  $\sigma_{r_t} = 0.08$ . Tables shows WAIC, WAIC standard error, and difference in WAIC from the best performing method. A lower WAIC indicates a better fit.

| Model  | WAIC    | WAIC SE | $\Delta$ WAIC |
|--------|---------|---------|---------------|
| JC     | 28152   | 139.126 | 0             |
| SD     | 28166.1 | 139.043 | 14.0644       |
| MTD    | 28205.9 | 139.032 | 53.8909       |
| TSW-29 | 28231.8 | 139.104 | 79.7723       |
| SW-29  | 28242   | 138.986 | 90.0124       |
| TSW-15 | 28246.3 | 139.075 | 94.3044       |
| SW-15  | 28252.6 | 139.01  | 100.576       |

Table F: Results of Simulation 2 where  $\alpha = 0.5$  and  $\sigma_{r_t} = 0.12$ . Tables shows WAIC, WAIC standard error, and difference in WAIC from the best performing method. A lower WAIC indicates a better fit.

| Model  | WAIC    | WAIC SE | $\Delta$ WAIC |
|--------|---------|---------|---------------|
| JC     | 28029.7 | 142.163 | 0             |
| SD     | 28063.2 | 142.201 | 33.5364       |
| TSW-15 | 28101   | 142.122 | 71.2716       |
| SW-15  | 28124.7 | 142.106 | 94.9784       |
| TSW-29 | 28128.8 | 142.219 | 99.1359       |
| MTD    | 28140.9 | 142.147 | 111.182       |
| SW-29  | 28183   | 142.237 | 153.295       |
